# Supplementary material for: A peptide nucleic acid-functionalized carbon nitride nanosheet as a probe for in situ monitoring of intracellular microRNA
Source: Royal Society of Chemistry journal article supplement (doi:10.1039/c5an00128e), 2015-01-01
Supplement: c5an00128e1.pdf [file c5an00128e1.pdf]

Electronic Supplementary Information (ESI) for Chemical Communications

This journal is (c) The Royal Society of Chemistry 2014

## Peptide nucleic acid-functionalized carbon nitride nanosheet as a probe for in situ monitoring of intracellular microRNA †

Xianjiu Liao, Quanbo Wang and Huangxian Ju\*

State Key Laboratory of Analytical Chemistry for Life Science, School of Chemistry and Chemical Engineering, Nanjing University, Nanjing 210093, P.R. China

\*Corresponding author. Tel./Fax: +86-25-83593593.

E-mail address: hxju@nju.edu.cn (H. X. Ju)

### Supplementary figures

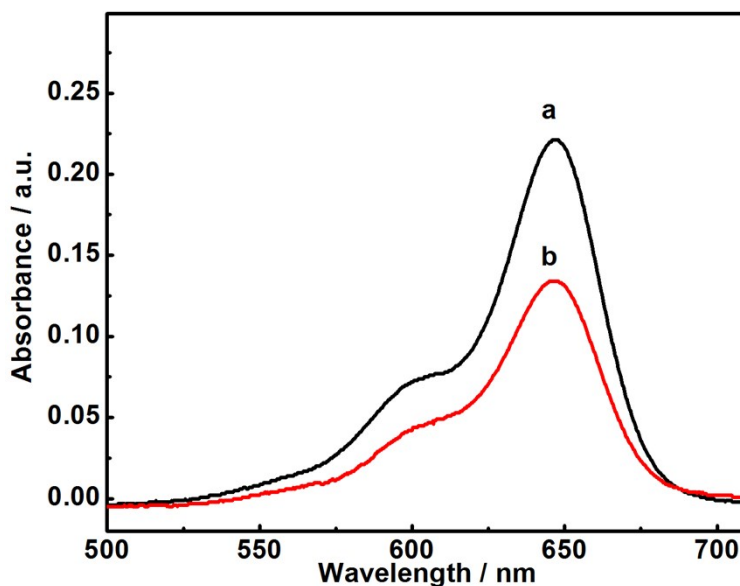

**Fig. S1** UV-visible absorption spectra of 500 nM Cy5-PNA (a) in the presence of 350  $\mu\text{g mL}^{-1}$  CNNS (b), curve (b) was measured using 350  $\mu\text{g mL}^{-1}$  CNNS as blank.

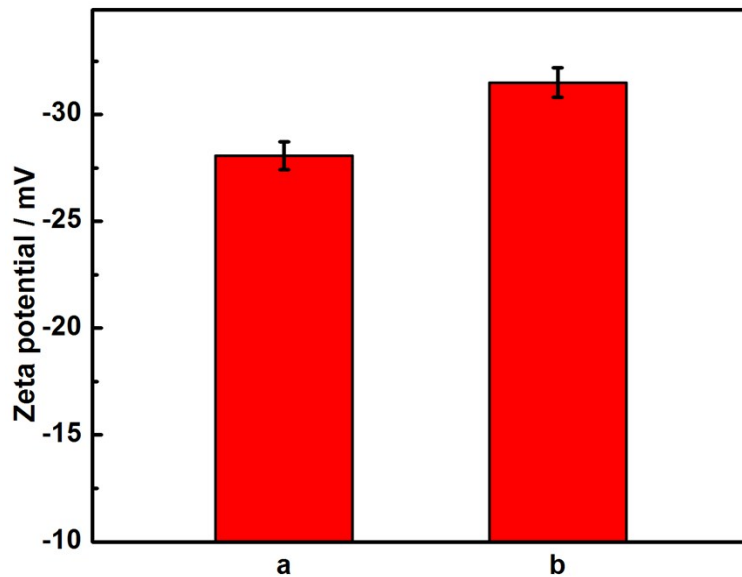

**Fig. S2** Zeta potentials of PNA-CNNS (a) and f-CNNS probe (b).

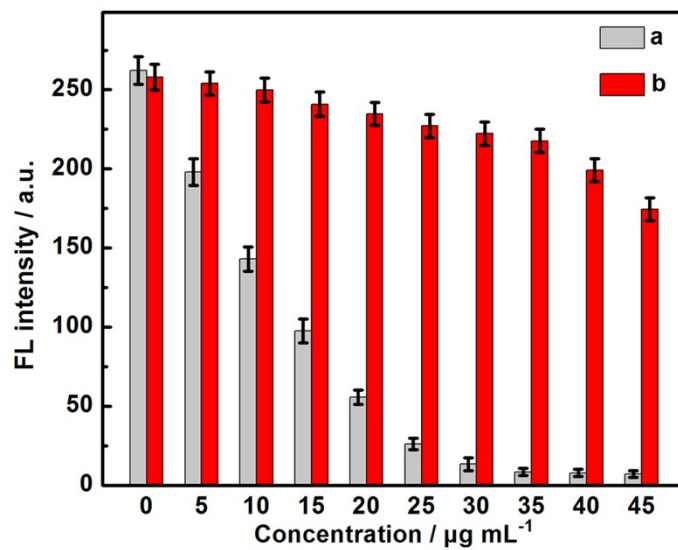

**Fig. S3** FL intensity of (A) 50 nM Cy5-PNA after incubation with 0, 5, 10, 15, 20, 25, 30, 35, 40 and 45  $\mu\text{g mL}^{-1}$  CNNS for 5 min (a) and then 250 nM miRNA-18a at 37 °C for 1 h (b). All measurements are performed in HB.

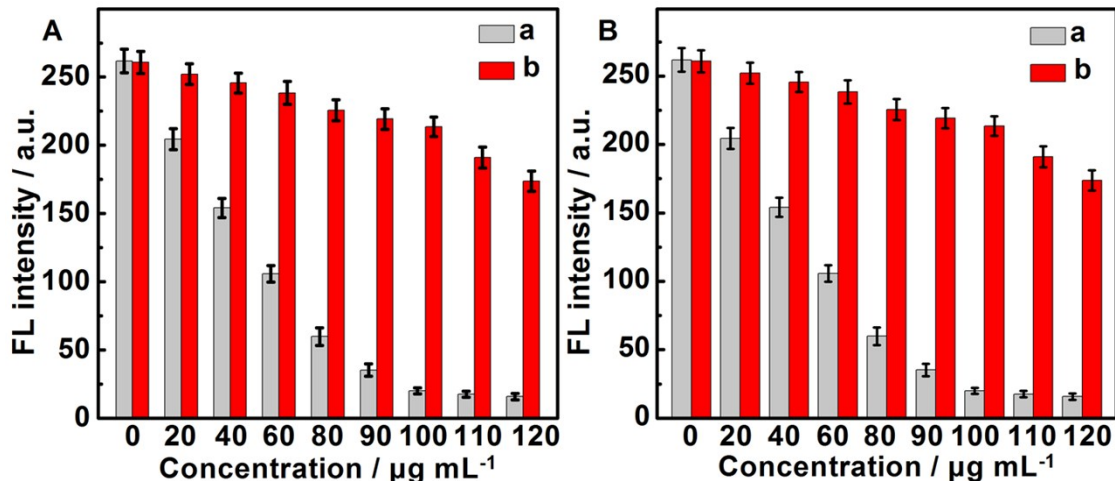

**Fig. S4** FL intensity of 50 nM Cy5-LNA (A) or Cy5-ssDNA (B) after incubation with 0, 20, 40, 60, 80, 90, 100, 110 and 120  $\mu\text{g mL}^{-1}$  CNNS for 5 min (a) and then 250 nM miRNA-18a at 37 °C for 1 h (b), respectively. All measurements are performed in HB.

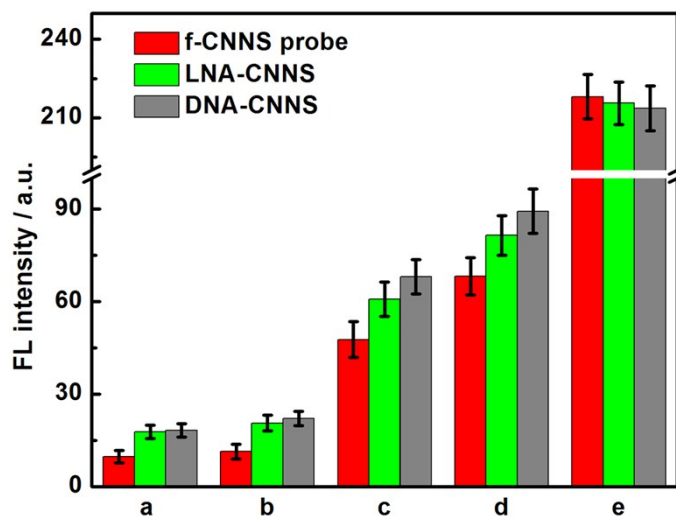

**Fig. S5** FL intensity of f-CNNS probe, LNA-CNNS and DNA-CNNS (a) after incubation with 250 nM non-complementary RNA (b), three-base mismatched strand (c), single-base mismatched strand (d) and miRNA-18a (e) at 37 °C for 1 h. The concentration of f-CNNS probe, LNA-CNNS and DNA-CNNS were 35, 100 and 100  $\mu\text{g mL}^{-1}$ , respectively. All measurements are performed in HB.

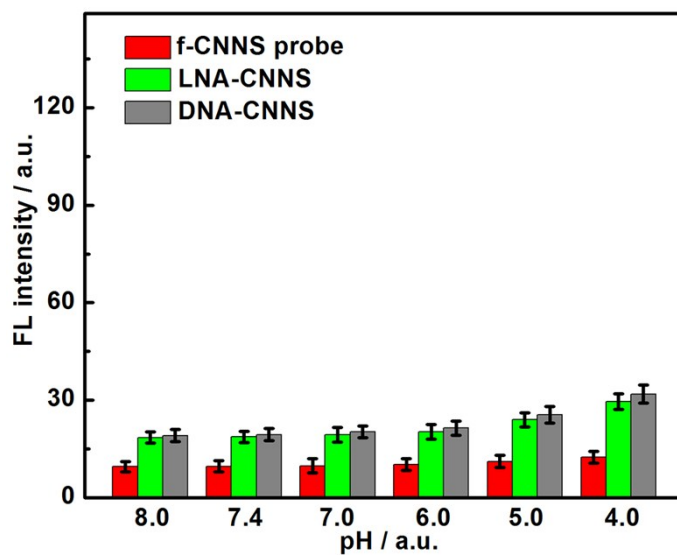

**Fig. S6** FL intensity of f-CNNS probe, LNA-CNNS and DNA-CNNS in pH 4.0, 5.0, 6.0, 7.0, 7.4 and 8.0 buffer solution. The concentration of f-CNNS probe, LNA-CNNS and DNA-CNNS were 35, 100 and 100  $\mu\text{g mL}^{-1}$ , respectively.

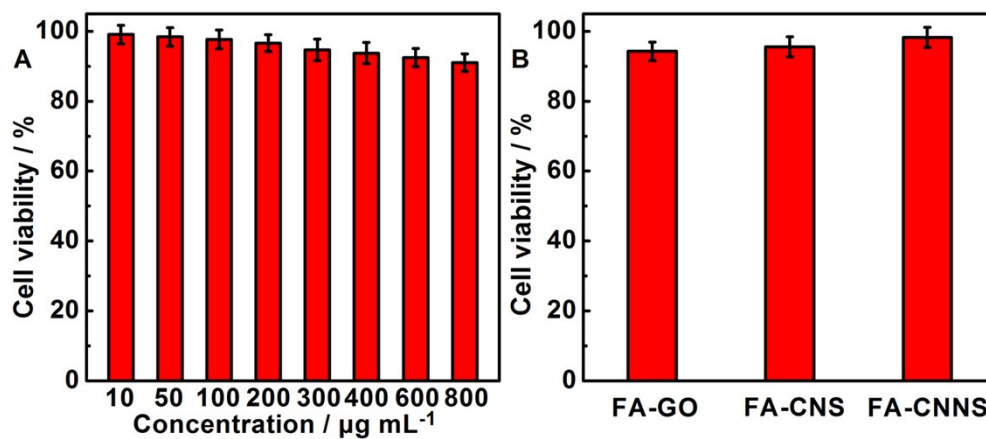

**Fig. S7** Viability of HepG2 cells after incubation with (A) 10, 50, 100, 200, 300, 400, 600 or 800  $\mu\text{g mL}^{-1}$  FA-CNNS, and (B) 35  $\mu\text{g mL}^{-1}$  FA-CNNS, FA-CNS or FA-GO at 37  $^{\circ}\text{C}$  for 3 h.

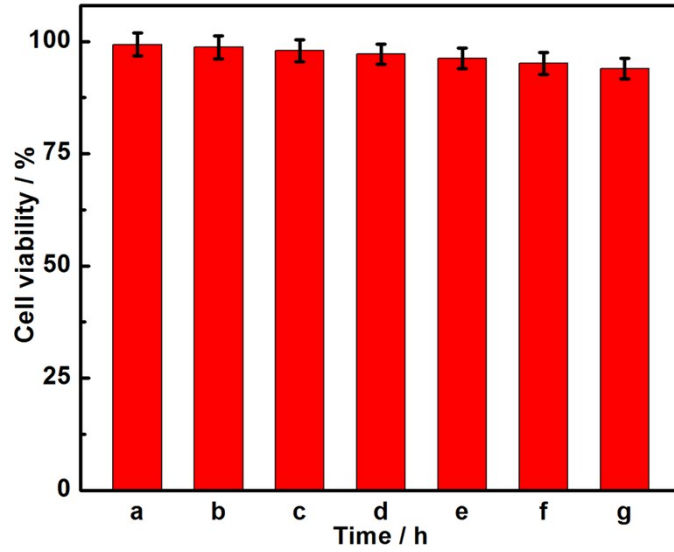

**Fig. S8** Viability of HepG2 cells after incubated with  $35 \mu\text{g mL}^{-1}$  f-CNNS probe at  $37^\circ\text{C}$  for 1, 2, 3, 4, 6, 9 and 12 h (from a to g).

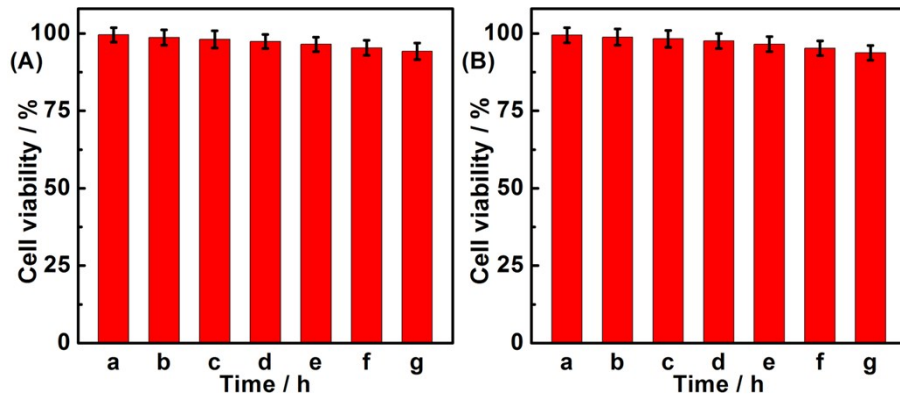

**Fig. S9** Viability of HeLa (A) and MDA-MB-231 (B) cells after incubated with  $35 \mu\text{g mL}^{-1}$  f-CNNS probe at  $37^\circ\text{C}$  for 1, 2, 3, 4, 6, 9 and 12 h (from a to g).

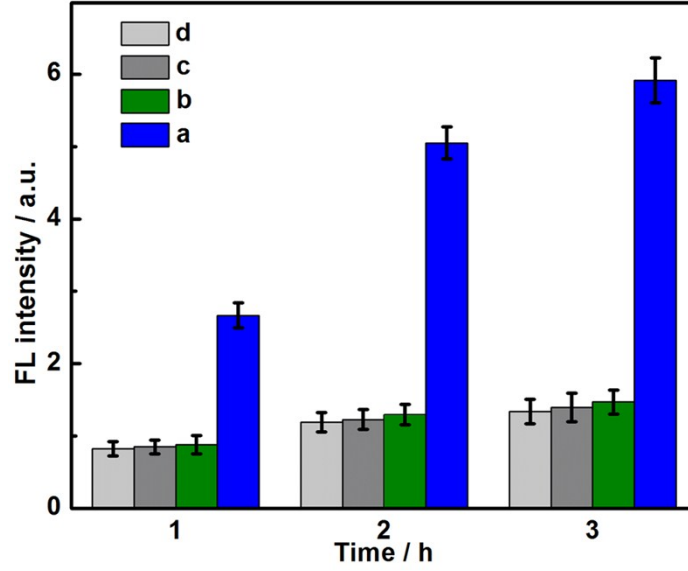

**Fig. S10** Confocal FL intensity of HepG2 cell transfected with  $35 \mu\text{g mL}^{-1}$  (a) FA-CNNS and (b) CNNS, and (c) A549 and (d) HaCaT cell transfected with  $35 \mu\text{g mL}^{-1}$  FA-CNNS at  $37^\circ\text{C}$  for 1, 2 and 3 h.

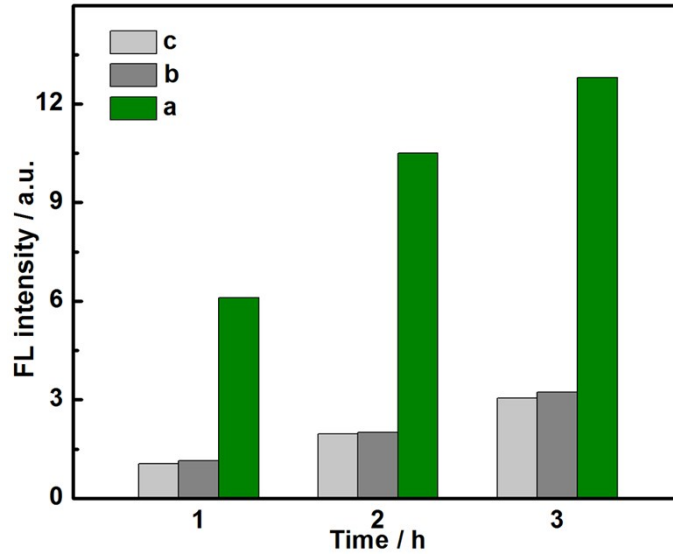

**Fig. S11** FL intensity from flow cytometric analysis of (a) HepG2 and (b) FR-saturated HepG2 cells transfected with  $35 \mu\text{g mL}^{-1}$  f-CNNS probe, (c) HepG2 cells transfected with  $35 \mu\text{g mL}^{-1}$  PNA-CNNS at  $37^\circ\text{C}$  for 1, 2 and 3 h.

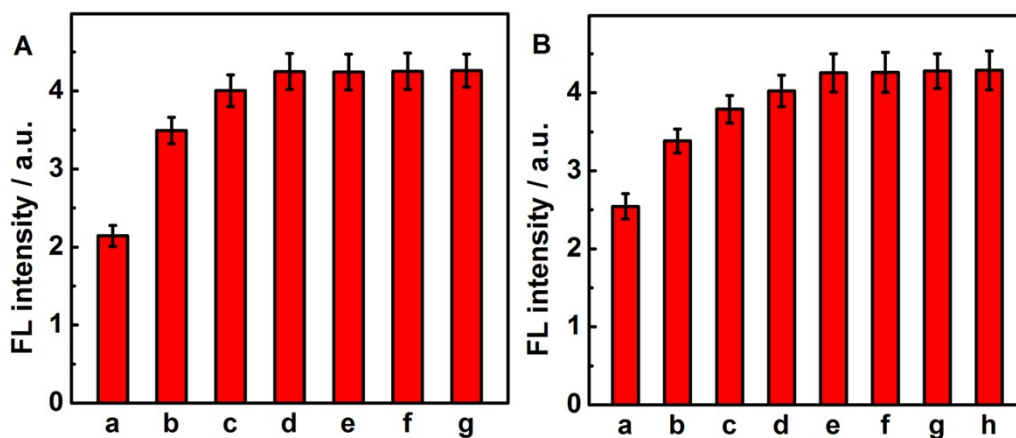

**Fig. S12** Confocal Cy5 FL intensity of HepG2 cell after incubation with (A) 35  $\mu\text{g mL}^{-1}$  f-CNNS probe at 37  $^{\circ}\text{C}$  for 1.0, 2.0, 2.5, 3.0, 3.5, 4.0 and 5.0 h (from a to g), (B) 10, 20, 25, 30, 35, 40, 45 and 50  $\mu\text{g mL}^{-1}$  f-CNNS probe at 37  $^{\circ}\text{C}$  for 3 h (from a to h).

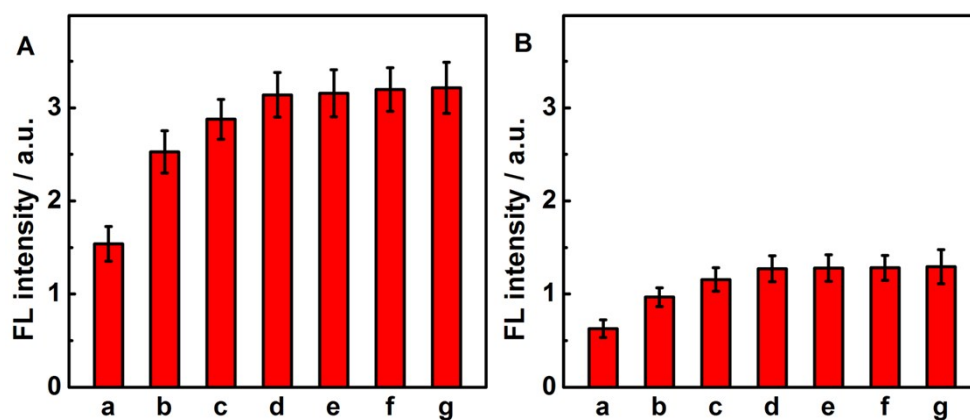

**Fig. S13** Confocal Cy5 FL intensity of HeLa (A) and MDA-MB-231 (B) cells after incubated with 35  $\mu\text{g mL}^{-1}$  f-CNNS probe at 37  $^{\circ}\text{C}$  for 1.0, 2.0, 2.5, 3.0, 3.5, 4.0 and 5.0 h (from a to g).

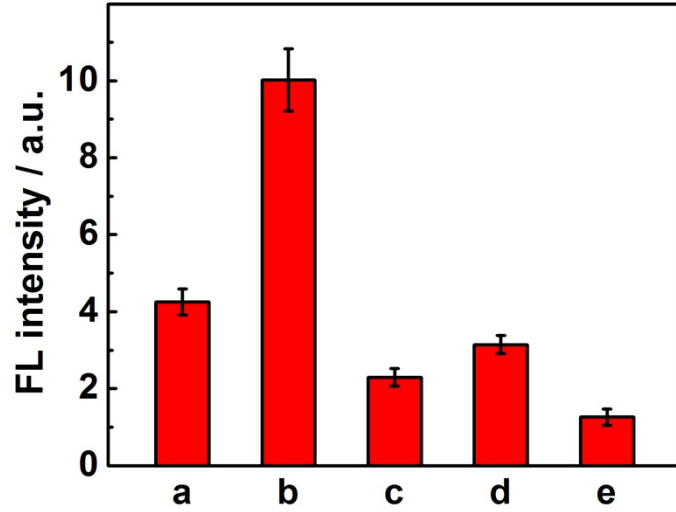

**Fig. S14** FL intensity of Cy5 from confocal microscopic analysis of HepG2 cells (a), HepG2 cells treated with 50 nM inhibitor-18a (b) and 5 nM miRNA-18a mimic (c) for 48 h, HeLa (d) and MDA-MB-231 (e) transfected with  $35 \mu\text{g mL}^{-1}$  f-CNNS probe at  $37^\circ\text{C}$  for 3 h.

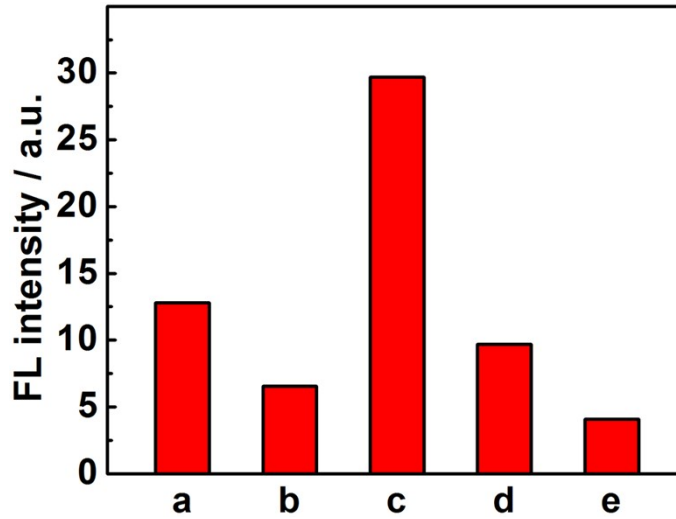

**Fig. S15** FL intensity of Cy5 from flow cytometric analysis of HepG2 cells (a), HepG2 cells treated with 50 nM inhibitor-18a (b) and 5 nM miRNA-18a mimic (c) for 48 h, HeLa (d) and MDA-MB-231 (e) transfected with  $35 \mu\text{g mL}^{-1}$  f-CNNS probe at  $37^\circ\text{C}$  for 3 h.



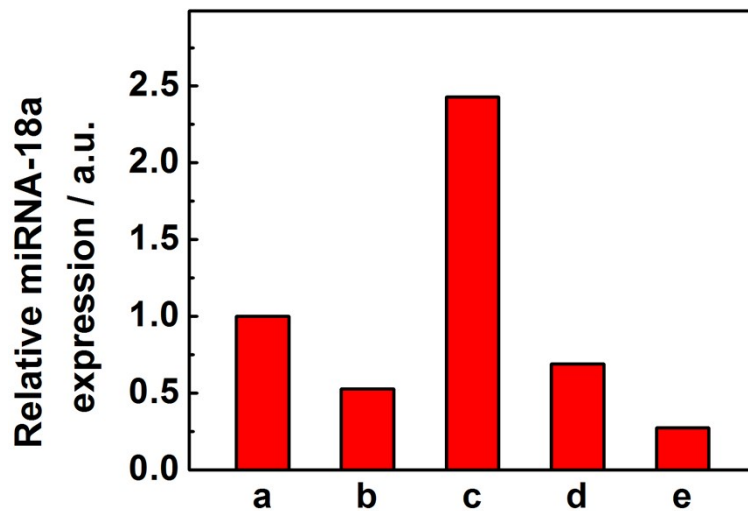

**Fig. S16** Relative expression of miRNA-18a from quantitative real-time PCR analysis of HepG2 cells (a), HepG2 cells treated with 50 nM inhibitor-18a (b) and 5 nM miRNA-18a mimic (c) for 48 h, HeLa (d) and MDA-MB-231 (e) cells transfected with  $35 \mu\text{g mL}^{-1}$  f-CNNS probe at  $37^\circ\text{C}$  for 3 h.
